# Supplementary material
Source: MDPI journal article supplement (https://www.mdpi.com/2227-9040/11/11/549)
Supplement: s1 [file s1]

SUPPLEMENTARY MATERIAL to:

# Towards Molecularly Imprinted Polypyrrole-Based Sensor for the Detection of Methylene Blue

**Raimonda Boguzaite <sup>1</sup>, Greta Pilvenyte <sup>1</sup>, Vilma Ratautaite <sup>1,\*</sup>, Ernestas Brazys <sup>2</sup>, Almira Ramanaviciene <sup>3</sup> and Arunas Ramanavicius <sup>1,2,\*</sup>**

<sup>1</sup> Department of Nanotechnology, State Research Institute Center for Physical Sciences and Technology (FTMC), Sauletekio Av. 3, LT-10257 Vilnius, Lithuania; raimonda.boguzaite@ftmc.lt (R.B.); greta.pilvenyte@ftmc.lt (G.P.)

<sup>2</sup> Department of Physical Chemistry, Institute of Chemistry, Faculty of Chemistry and Geosciences, Vilnius University (VU), Naugarduko Str. 24, LT-03225 Vilnius, Lithuania; ernestas.brazys@chgf.stud.vu.lt

<sup>3</sup> NanoTechnas—Center of Nanotechnology and Materials Science, Institute of Chemistry, Faculty of Chemistry and Geosciences, Vilnius University (VU), Naugarduko Str. 24, LT-03225 Vilnius, Lithuania; almira.ramanaviciene@chf.vu.lt

\* Correspondence: vilma.ratautaite@ftmc.lt (V.R.); arunas.ramanavicius@chf.vu.lt (A.R.)

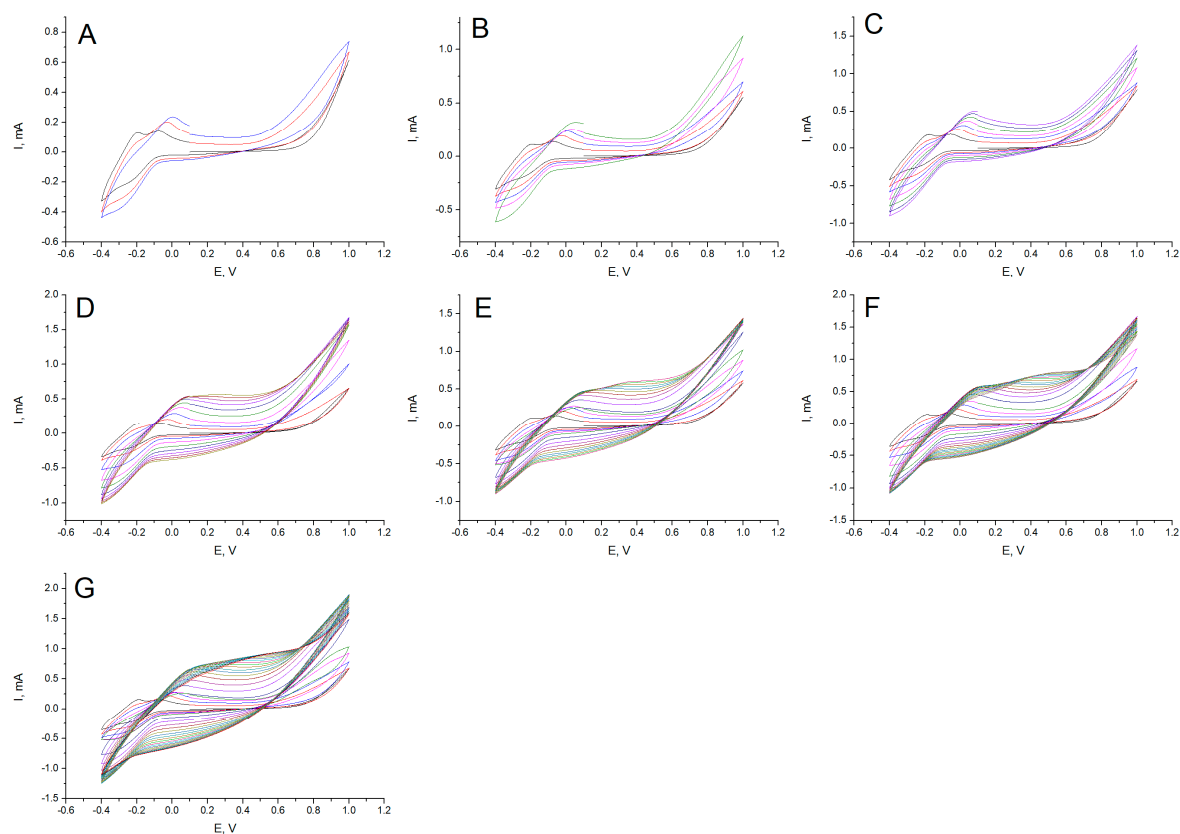

**Figure S1.** Cyclic voltammograms of Ppy-MB during electrochemical deposition. Ppy-MB layers deposited by (A-G) 3, 5, 7, 10, 15, 20, 25 potential cycles, respectively. Other conditions: potential was swept from  $-0.4$  V to  $+1$  V at a scan rate of  $50$  mV/s, and a step potential of  $2.44$  mV. Electrochemical polymerisation was performed in a three-electrode system, in which glass/ITO was used as the working electrode Ag/AgCl as the reference electrode, and platinum wire as the counter electrode.

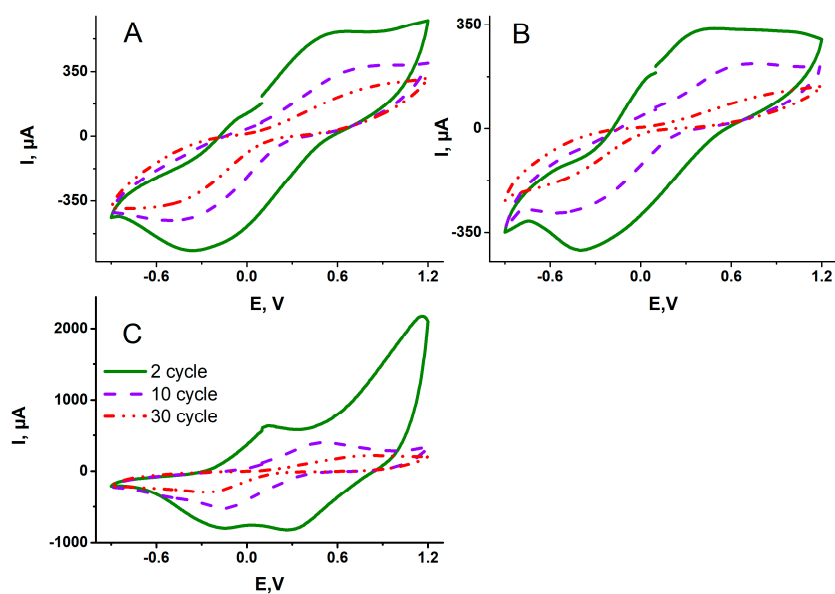

**Figure S2.** Electrode storage in different mediums (layer polymerized with 25 cycles), after 12 days, **(A)** 0,01 M BR buffer solution, pH 3; **(B)** in water; **(C)** in air. Cycling voltammograms performed in the range from -0.9 V to +1.2 V vs. Ag/AgCl<sub>3M KCl</sub> at a scan rate of 50 mV/s, a step potential of 2.44 mV, and 30 potential cycles were applied.

|   | Magnification ×800                                                                  |   | Magnification ×8000                                                                  |
|---|-------------------------------------------------------------------------------------|---|--------------------------------------------------------------------------------------|
| A | 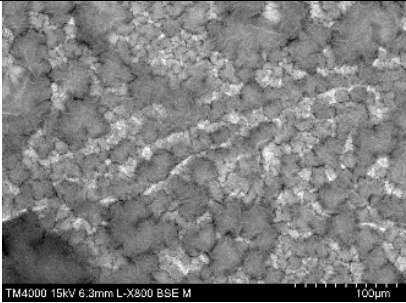   | B |    |
| C |    | D |    |
| E |   | F |   |
| G |  | H |  |
| I |  | J |  |

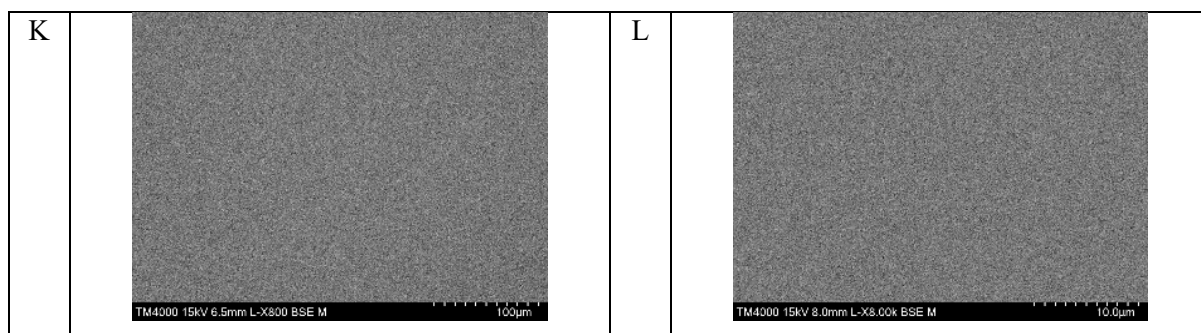

**Figure S3.** SEM images of Ppy-MB which were electropolymerized by: 25 potential cycles at magnification  $\times 800$  (**A**) and  $\times 8000$  (**B**), 20 potential cycles at magnification  $\times 800$  (**C**) and  $\times 8000$  (**D**), 15 potential cycles at magnification  $\times 800$  (**E**) and  $\times 8000$  (**F**), 10 potential cycles at magnification  $\times 800$  (**G**) and  $\times 8000$  (**H**), 7 potential cycles at magnification  $\times 800$  (**I**) and  $\times 8000$  (**J**), and 5 potential cycles at magnification  $\times 800$  (**K**) and  $\times 8000$  (**L**). Images of different magnifications were taken for layers of different heights (according to the number of deposition cycles), each time analysing the same layer, and choosing a similar point.

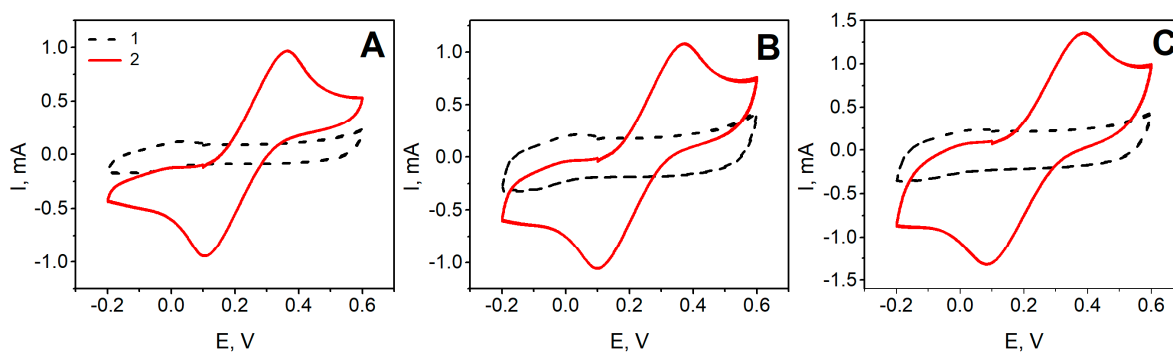

**Figure S4.** Cyclic voltammograms of differently modified electrodes were recorded immediately after deposition in the BR buffer solution without (1) and with (2)  $\text{K}_3[\text{Fe}(\text{CN})_6]/\text{K}_4[\text{Fe}(\text{CN})_6]$  as a redox probe. **(A)** Ppy-MB-5, **(B)** Ppy-MB-7, **(C)** Ppy-MB-10 electrode. Cyclic voltammograms were recorded in the potential range from  $-0.2$  V to  $+0.6$  V vs.  $\text{Ag}/\text{AgCl}_{3\text{M KCl}}$ , at the scan rate of  $50$  mV/s and step lift of  $2.44$  mV, in total 3 potential cycles.

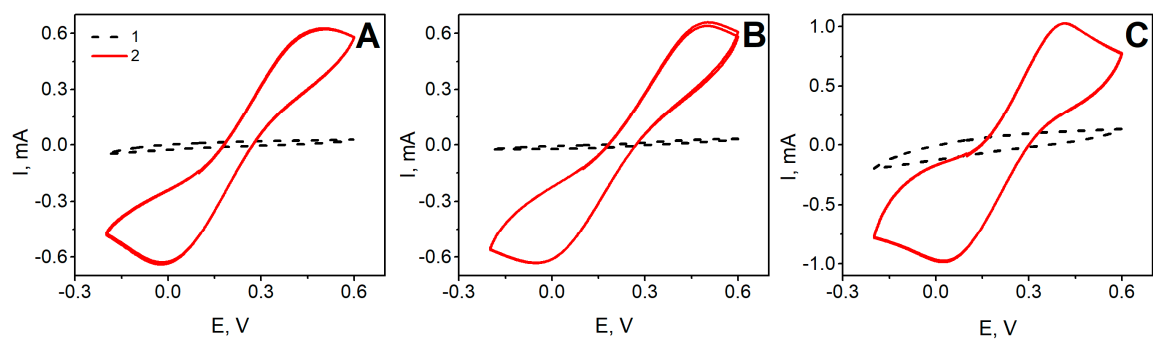

**Figure S5.** Cyclic voltammograms of differently modified electrodes were recorded six weeks after deposition in the BR buffer solution without (1) and with (2)  $K_3[Fe(CN)_6]/K_4[Fe(CN)_6]$  as a redox probe. **(A)** Ppy-MB-5, **(B)** Ppy-MB-7, **(C)** Ppy-MB-10 electrode. CV conditions the same as described in Figure 4S.
